# Supplementary material
Source: ML conference proceedings conference paper supplement (https://proceedings.mlr.press/v84/jovan18a.html)
Supplement: Supplementary file [file jovan18a-supp.pdf]

## Supplementary

Here we provide detailed sensor models for each region. The sensor model was built from 15 days of data to give a general idea how each sensor performs across days. For the experiment itself, as we performed five fold cross validation, we only used 3 days of data to build the sensor model.

Table 1: Averaged sensor model for each region trained from 15 days of data.

| Region | Sensor         | True Negative | True Positive |
|--------|----------------|---------------|---------------|
| 1      | Leg            | 0.820         | 0.102         |
|        | Upper body     | 0.749         | 0.244         |
|        | Scenery change | 0.760         | 0.612         |
| 2      | Leg            | 0.991         | 0.655         |
|        | Upper body     | 0.862         | 0.691         |
|        | Scenery change | 0.826         | 0.778         |
| 3      | Leg            | 0.854         | 0.116         |
|        | Upper body     | 0.833         | 0.130         |
|        | Scenery change | 0.780         | 0.687         |
| 4      | Leg            | 0.896         | 0.180         |
|        | Upper body     | 0.967         | 0.227         |
|        | Scenery change | 0.897         | 0.592         |
| 5      | Leg            | 0.918         | 0.086         |
|        | Upper body     | 0.881         | 0.200         |
|        | Scenery change | 0.877         | 0.957         |
| 6      | Leg            | 0.964         | 0.351         |
|        | Upper body     | 0.929         | 0.143         |
|        | Scenery change | 0.803         | 0.541         |
| 7      | Leg            | 0.949         | 0.264         |
|        | Upper body     | 0.829         | 0.071         |
|        | Scenery change | 0.939         | 0.090         |
| 8      | Leg            | 0.889         | 0.473         |
|        | Upper body     | 0.791         | 0.360         |
|        | Scenery change | 0.900         | 0.591         |
| 9      | Leg            | 0.702         | 0.383         |
|        | Upper body     | 0.711         | 0.172         |
|        | Scenery change | 0.591         | 0.673         |
| 10     | Leg            | 0.956         | 0.537         |
|        | Upper body     | 0.973         | 0.423         |
|        | Scenery change | 0.823         | 0.584         |
